# Supplementary material
Source: PubMed Central journal article supplement (PMC9649436)
Supplement: ciac591_supplementary_data.pdf [file ciac591_supplementary_data.pdf]

**Supplement for *Postexposure Prophylaxis and Treatment of Bacillus anthracis Infections in Animals Models: Systematic Review***

By Kennedy JL et al.

Published in *Clinical Infectious Disease*

## Table of Contents

|                                |                                                                                                                                              |    |
|--------------------------------|----------------------------------------------------------------------------------------------------------------------------------------------|----|
| <b>Supplementary Figure 1.</b> | Search String for Systematic Review of In Vivo Data for Postexposure Prophylaxis and Treatment of <i>Bacillus anthracis</i> Infections ..... | 3  |
| <b>Supplementary Text 1.</b>   | Methods for Quality Score Assessment .....                                                                                                   | 4  |
| <b>Supplementary Figure 2.</b> | Quality Assessment Tool for In Vivo Studies.....                                                                                             | 5  |
| <b>Supplementary Table 1.</b>  | Line List of In Vivo Postexposure Prophylaxis and Treatment Studies By Study Arm .....                                                       | 6  |
| <b>Supplementary Figure 3.</b> | Forest Plots for Monotherapy Studies .....                                                                                                   | 15 |
| <b>Supplementary Text 2.</b>   | Information on Monte Carlo Simulations.....                                                                                                  | 16 |

## Supplementary Figure 1. Search String for Systematic Review of In Vivo Data for Postexposure Prophylaxis and Treatment of *Bacillus Anthracis* Infections

Anthrax OR Anthracis

AND

antibiotic\* OR antiinfective\* OR anti-infective\* OR antibacterial\* OR anti-bacterial\* OR antimicrobial\* OR anti-microbial\* OR Ciprofloxacin OR Moxifloxacin OR Levofloxacin OR Gentamicin OR Erythromycin OR Azithromycin OR Clarithromycin OR Penicillin\* OR Amoxicillin OR Ampicillin OR Amoxi?clav OR Piperacillin OR Imipenem OR Meropenem OR Ceftriaxone OR Cefotaxime OR Cefoxitin OR Vancomycin OR Dalbavancin OR Telavancin OR Oritavancin OR Tetracycline OR Doxycycline OR Minocycline OR Linezolid OR Tedizolid OR Clindamycin OR Quinupristin OR dalfopristin OR Rifampin OR Streptomycin OR Chloramphenicol

AND

Trial\* OR RCT OR study OR studies OR in vitro OR in vivo

## Supplementary Text 1. Methods for Quality Score Assessment

Study quality was assessed on a 24-point scale comprising 4 main topics (Supplementary Figure 2). Points were allotted for 1) animal descriptions mentioning the species or strain, nonhuman primates (NHPs), sample size, age, weight, presence of a control group, presence of a positive control group (ie, ciprofloxacin or doxycycline), study conditions, and blinding; 2) exposures specifying the *B. anthracis* strain, challenge dose, inoculation dose measurement overall and for specific arms, spores being used rather than vegetative cells, inoculation route, and exposure group randomization; 3) antimicrobial descriptions mentioning pharmacokinetic data or humanization of the dose (ie, animal drug exposures are matched human exposures) [1], route of administration, and MICs; and 4) outcomes specifying all causes of death, immunological parameters such as antibody levels, pathology (eg, brain, lung), and results for all variables. Quality scores were categorized as low (0-5 points), fair (6-13 points), good (14-17 points), and high (18-24 points) based on natural breaks in a histogram of the scores and discussions with an internal CDC steering committee.

### References for Quality Score Assessment

Bulitta JB, Hope WW, Eakin AE, et al. Generating Robust and Informative Nonclinical In Vitro and In Vivo Bacterial Infection Model Efficacy Data To Support Translation to Humans. *Antimicrob Agents Chemother* 2019; 63(5).

## Supplementary Figure 2. Quality Assessment Tool for In Vivo Studies

### Animals: Did the authors report/describe the...

|   | Y                        | N                        |                                                                                                      |
|---|--------------------------|--------------------------|------------------------------------------------------------------------------------------------------|
| 1 | <input type="checkbox"/> | <input type="checkbox"/> | specific strain/breed of animal?                                                                     |
| 2 | <input type="checkbox"/> | <input type="checkbox"/> | NHP?                                                                                                 |
| 3 | <input type="checkbox"/> | <input type="checkbox"/> | sample size of each arm clearly?                                                                     |
| 4 | <input type="checkbox"/> | <input type="checkbox"/> | the ages of animals?                                                                                 |
| 5 | <input type="checkbox"/> | <input type="checkbox"/> | the weights of animals?                                                                              |
| 6 | <input type="checkbox"/> | <input type="checkbox"/> | the control groups adequately (e.g., were they treated with vehicle / saline [same dosing regimen])? |
| 7 | <input type="checkbox"/> | <input type="checkbox"/> | using a positive control (e.g., ciprofloxacin)?                                                      |
| 8 | <input type="checkbox"/> | <input type="checkbox"/> | study conditions (i.e., good laboratory practices [GLP])?                                            |
| 9 | <input type="checkbox"/> | <input type="checkbox"/> | whether the people assessing outcomes were blinded?                                                  |

### Exposure: Did the authors report...

|    | Y                        | N                        |                                                                                                                   |
|----|--------------------------|--------------------------|-------------------------------------------------------------------------------------------------------------------|
| 10 | <input type="checkbox"/> | <input type="checkbox"/> | the <i>Bacillus anthracis</i> strain?                                                                             |
| 11 | <input type="checkbox"/> | <input type="checkbox"/> | the <i>B. anthracis</i> challenge dose (1 for overall range, 2 for specific exposure for each arm)?               |
| 12 | <input type="checkbox"/> | <input type="checkbox"/> | how the <i>B. anthracis</i> inoculation dose was measured?                                                        |
| 13 | <input type="checkbox"/> | <input type="checkbox"/> | if <i>B. anthracis</i> spores (as opposed to vegetative cells) were used?                                         |
| 14 | <input type="checkbox"/> | <input type="checkbox"/> | the specific route through which the animals were inoculated with <i>B. anthracis</i> (e.g., whole-body aerosol)? |
| 15 | <input type="checkbox"/> | <input type="checkbox"/> | whether animals were randomized by exposure group if not all exposed at once?                                     |

### Antibiotics: Did the authors report...

|    | Y                        | N                        |                                                                                                           |
|----|--------------------------|--------------------------|-----------------------------------------------------------------------------------------------------------|
| 16 | <input type="checkbox"/> | <input type="checkbox"/> | PK data for relevant antibiotics (or was dose that was used justified (i.e., reference to other article)? |
| 17 | <input type="checkbox"/> | <input type="checkbox"/> | whether the antibiotic doses were humanized?                                                              |
| 18 | <input type="checkbox"/> | <input type="checkbox"/> | how the antibiotics were administered (route, dose, frequency, duration)?                                 |
| 19 | <input type="checkbox"/> | <input type="checkbox"/> | relevant MICs (for challenge strain)?                                                                     |

### Outcomes: Did the authors report...

|    | Y                        | N                        |                                                       |
|----|--------------------------|--------------------------|-------------------------------------------------------|
| 20 | <input type="checkbox"/> | <input type="checkbox"/> | specific causes of all deaths?                        |
| 21 | <input type="checkbox"/> | <input type="checkbox"/> | immunity (anti-PA, response to rechallenge)           |
| 22 | <input type="checkbox"/> | <input type="checkbox"/> | pathology (e.g., tissue CFUs)?                        |
| 23 | <input type="checkbox"/> | <input type="checkbox"/> | results of all outcome variables assessed completely? |
| 24 | <input type="checkbox"/> | <input type="checkbox"/> | MICs done on isolates from animals that died?         |

**Supplementary Table 1. Line List of In Vivo Postexposure Prophylaxis and Treatment Studies by Study Arm**

| Publication           | Species | Subjects | <i>Bacillus anthracis</i> challenge |                  |                   |                         |                         |      | Antimicrobial                 |        |       |           |              |            |                |                |            |              |
|-----------------------|---------|----------|-------------------------------------|------------------|-------------------|-------------------------|-------------------------|------|-------------------------------|--------|-------|-----------|--------------|------------|----------------|----------------|------------|--------------|
|                       |         |          | Strain                              | Resistant to Abx | Multiples of LD50 |                         | Route                   | Name | Start Time or Trigger (hours) | PEP/Rx | Route | mg/kg/day | units/kg/day | Repetition | Duration, Days | Follow Up Days | Fatalities |              |
|                       |         |          |                                     |                  | Mean (range)      | Median (range)          |                         |      |                               |        |       |           |              |            |                |                |            | Mean (range) |
| Barnes, 1947 [1]      | R       | 5        | Monroe                              | N                |                   | 50000                   |                         | IV   | penicillin                    | bact   | Rx    | IV        | 1440         | 4          | 2              | 2              | 5          |              |
| Barnes, 1947 [1]      | R       | 10       | Monroe                              | N                |                   | 100000                  |                         | IV   | control                       |        |       |           |              |            |                | 6              | 10         |              |
| Barnes, 1947 [1]      | R       | 10       | Monroe                              | N                |                   | 100000                  |                         | IV   | penicillin                    | 48     | Rx    | IV        | 1440         | 4          | 6              | 6              | 10         |              |
| Barnes, 1947 [1]      | R       | 4        | Monroe                              | N                |                   | 100000                  |                         | IV   | control                       |        |       |           |              | 4          |                | 8              | 4          |              |
| Henderson, 1956 [2]   | NHP     | 10       |                                     | N                |                   |                         | 214000                  | A    | control                       |        |       | IM        |              | 24         | 5              | 49             | 9          |              |
| Henderson, 1956 [2]   | NHP     | 10       |                                     | N                |                   |                         | 214000                  | A    | penicillin                    | 24     | PEP   | IM        | 34803        | 24         | 5              | 49             | 8          |              |
| Henderson, 1956 [2]   | NHP     | 10       |                                     | N                |                   |                         | 390000                  | A    | control                       |        |       | IM        |              | 24         |                | 59             | 10         |              |
| Henderson, 1956 [2]   | NHP     | 9        |                                     | N                |                   |                         | 390000                  | A    | penicillin                    | 24     | PEP   | IM        | 38412        | 24         | 5              | 59             | 9          |              |
| Henderson, 1956 [2]   | NHP     | 9        |                                     | N                |                   |                         | 390000                  | A    | penicillin                    | 24     | PEP   | IM        | 38412        | 24         | 10             | 59             | 9          |              |
| Henderson, 1956 [2]   | NHP     | 6        |                                     | N                |                   |                         | 390000                  | A    | penicillin                    | 24     | PEP   | IM        | 38412        | 24         | 20             | 44             | 2          |              |
| Henderson, 1956 [2]   | NHP     | 10       |                                     | N                |                   |                         | 200000                  | A    | control                       |        |       |           |              |            |                | 50             | 9          |              |
| Henderson, 1956 [2]   | NHP     | 10       |                                     | N                |                   |                         | 750000                  | A    | control                       |        |       |           |              |            |                | 50             | 10         |              |
| Gochenour, 1962 [3]   | NHP     | 6        | Vollum                              | N                |                   | 783000 (345000-1200000) |                         | A    | control                       |        |       |           |              |            |                | 31             | 6          |              |
| Gochenour, 1962 [3]   | NHP     | 5        | Vollum                              | N                |                   | 783000 (345000-1200000) |                         | A    | procaine penicillin           | 24     | PEP   | IM        | 63830        | 24         | 5              | 31             | 4          |              |
| Gochenour, 1962 [3]   | NHP     | 5        | Vollum                              | N                |                   | 783000 (345000-1200000) |                         | A    | procaine penicillin           | 48     | Rx    | IM        | 63830        | 24         | 5              | 31             | 1          |              |
| Gochenour, 1962 [3]   | NHP     | 4        | Vollum                              | N                |                   | 783000 (345000-1200000) |                         | A    | procaine penicillin           | 72     | Rx    | IM        | 63830        | 24         | 5              | 31             | 2          |              |
| NA, 1971 <sup>c</sup> | NHP     | 6        | Vollum                              | N                |                   |                         | 783000 (345000-1200000) | HOA  | control                       |        |       |           |              |            |                | 31             | 6          |              |
| NA, 1971 <sup>c</sup> | NHP     | 5        | Vollum                              | N                |                   |                         | 783000 (345000-1200000) | HOA  | penicillin                    | 24     | PEP   | IM        | 63830        | 24         | 5              | 31             | 4          |              |
| NA, 1971 <sup>c</sup> | NHP     | 5        | Vollum                              | N                |                   |                         | 783000 (345000-1200000) | HOA  | penicillin                    | 48     | Rx    | IM        | 63830        | 24         | 5              | 31             | 1          |              |
| NA, 1971 <sup>c</sup> | NHP     | 4        | Vollum                              | N                |                   |                         | 783000 (345000-1200000) | HOA  | penicillin                    | 72     | Rx    | IM        | 63830        | 24         | 5              | 31             | 2          |              |
| Pomerantsev, 1992 [4] | M       | 10       | H-7                                 | N                |                   | 10                      |                         | SC   | control                       |        |       |           |              |            |                |                | 6          |              |
| Pomerantsev, 1992 [4] | M       | 10       | H-7                                 | N                |                   | 10                      |                         | SC   | tetracycline                  | 3      | PEP   | IM        | 32           | 24         | 5              |                | 0          |              |
| Pomerantsev, 1992 [4] | M       | 10       | H-7                                 | N                |                   | 10                      |                         | SC   | tetracycline                  | 20     | PEP   | IM        | 32           | 24         | 7              |                | 0          |              |
| Pomerantsev, 1992 [4] | M       | 10       | H-7                                 | N                |                   | 100                     |                         | SC   | control                       |        |       |           |              |            |                |                | 8          |              |
| Pomerantsev, 1992 [4] | M       | 10       | H-7                                 | N                |                   | 100                     |                         | SC   | tetracycline                  | 3      | PEP   | IM        | 32           | 24         | 5              |                | 0          |              |
| Pomerantsev, 1992 [4] | M       | 10       | H-7                                 | N                |                   | 100                     |                         | SC   | tetracycline                  | 20     | PEP   | IM        | 32           | 24         | 7              |                | 0          |              |
| Pomerantsev, 1992 [4] | M       | 10       | H-7                                 | N                |                   | 1000                    |                         | SC   | control                       |        |       |           |              |            |                |                | 10         |              |
| Pomerantsev, 1992 [4] | M       | 10       | H-7                                 | N                |                   | 1000                    |                         | SC   | tetracycline                  | 3      | PEP   | IM        | 32           | 24         | 5              |                | 0          |              |
| Pomerantsev, 1992 [4] | M       | 10       | H-7                                 | N                |                   | 1000                    |                         | SC   | tetracycline                  | 20     | PEP   | IM        | 32           | 24         | 7              |                | 0          |              |

|                       |   |    |             |   |      |    |              |    |     |    |    |    |   |    |  |  |    |
|-----------------------|---|----|-------------|---|------|----|--------------|----|-----|----|----|----|---|----|--|--|----|
| Pomerantsev, 1992 [4] | H | 10 | H-7         | N | 10   | SC | control      |    |     |    |    |    |   |    |  |  | 8  |
| Pomerantsev, 1992 [4] | H | 10 | H-7         | N | 10   | SC | tetracycline | 20 | PEP | IM | 4  | 24 | 7 | 0  |  |  |    |
| Pomerantsev, 1992 [4] | H | 10 | H-7         | N | 10   | SC | tetracycline | 20 | PEP | IM | 8  | 24 | 7 | 0  |  |  |    |
| Pomerantsev, 1992 [4] | H | 10 | H-7         | N | 10   | SC | tetracycline | 20 | PEP | IM | 16 | 24 | 7 | 0  |  |  |    |
| Pomerantsev, 1992 [4] | H | 10 | H-7         | N | 10   | SC | doxycycline  | 20 | PEP | IM | 4  | 24 | 7 | 0  |  |  |    |
| Pomerantsev, 1992 [4] | H | 10 | H-7         | N | 10   | SC | doxycycline  | 20 | PEP | IM | 8  | 24 | 7 | 0  |  |  |    |
| Pomerantsev, 1992 [4] | H | 10 | H-7         | N | 10   | SC | doxycycline  | 20 | PEP | IM | 16 | 24 | 7 | 0  |  |  |    |
| Pomerantsev, 1992 [4] | H | 10 | H-7         | N | 10   | SC | minocycline  | 20 | PEP | IM | 2  | 24 | 7 | 0  |  |  |    |
| Pomerantsev, 1992 [4] | H | 10 | H-7         | N | 10   | SC | minocycline  | 20 | PEP | IM | 4  | 24 | 7 | 0  |  |  |    |
| Pomerantsev, 1992 [4] | H | 10 | H-7         | N | 10   | SC | minocycline  | 20 | PEP | IM | 8  | 24 | 7 | 0  |  |  |    |
| Pomerantsev, 1992 [4] | H | 10 | H-7         | N | 10   | SC | minocycline  | 20 | PEP | IM | 16 | 24 | 7 | 0  |  |  |    |
| Pomerantsev, 1992 [4] | H | 10 | H-7         | N | 100  | SC | control      |    |     |    |    |    |   |    |  |  | 10 |
| Pomerantsev, 1992 [4] | H | 10 | H-7         | N | 100  | SC | tetracycline | 20 | PEP | IM | 4  | 24 | 7 | 10 |  |  |    |
| Pomerantsev, 1992 [4] | H | 10 | H-7         | N | 100  | SC | tetracycline | 20 | PEP | IM | 8  | 24 | 7 | 4  |  |  |    |
| Pomerantsev, 1992 [4] | H | 10 | H-7         | N | 100  | SC | tetracycline | 20 | PEP | IM | 16 | 24 | 7 | 2  |  |  |    |
| Pomerantsev, 1992 [4] | H | 10 | H-7         | N | 100  | SC | doxycycline  | 20 | PEP | IM | 4  | 24 | 7 | 4  |  |  |    |
| Pomerantsev, 1992 [4] | H | 10 | H-7         | N | 100  | SC | doxycycline  | 20 | PEP | IM | 8  | 24 | 7 | 0  |  |  |    |
| Pomerantsev, 1992 [4] | H | 10 | H-7         | N | 100  | SC | doxycycline  | 20 | PEP | IM | 16 | 24 | 7 | 0  |  |  |    |
| Pomerantsev, 1992 [4] | H | 10 | H-7         | N | 100  | SC | minocycline  | 20 | PEP | IM | 2  | 24 | 7 | 0  |  |  |    |
| Pomerantsev, 1992 [4] | H | 10 | H-7         | N | 100  | SC | minocycline  | 20 | PEP | IM | 4  | 24 | 7 | 0  |  |  |    |
| Pomerantsev, 1992 [4] | H | 10 | H-7         | N | 100  | SC | minocycline  | 20 | PEP | IM | 8  | 24 | 7 | 0  |  |  |    |
| Pomerantsev, 1992 [4] | H | 10 | H-7         | N | 100  | SC | minocycline  | 20 | PEP | IM | 16 | 24 | 7 | 0  |  |  |    |
| Pomerantsev, 1992 [4] | H | 10 | H-7         | N | 100  | SC | control      |    |     |    |    |    |   |    |  |  | 10 |
| Pomerantsev, 1992 [4] | H | 10 | H-7         | N | 100  | SC | tetracycline | 20 | PEP | IM | 4  | 24 | 7 | 10 |  |  |    |
| Pomerantsev, 1992 [4] | H | 10 | H-7         | N | 1000 | SC | tetracycline | 20 | PEP | IM | 8  | 24 | 7 | 10 |  |  |    |
| Pomerantsev, 1992 [4] | H | 10 | H-7         | N | 1000 | SC | tetracycline | 20 | PEP | IM | 16 | 24 | 7 | 4  |  |  |    |
| Pomerantsev, 1992 [4] | H | 10 | H-7         | N | 1000 | SC | doxycycline  | 20 | PEP | IM | 4  | 24 | 7 | 8  |  |  |    |
| Pomerantsev, 1992 [4] | H | 10 | H-7         | N | 1000 | SC | doxycycline  | 20 | PEP | IM | 8  | 24 | 7 | 8  |  |  |    |
| Pomerantsev, 1992 [4] | H | 10 | H-7         | N | 1000 | SC | doxycycline  | 20 | PEP | IM | 16 | 24 | 7 | 6  |  |  |    |
| Pomerantsev, 1992 [4] | H | 10 | H-7         | N | 1000 | SC | minocycline  | 20 | PEP | IM | 2  | 24 | 7 | 0  |  |  |    |
| Pomerantsev, 1992 [4] | H | 10 | H-7         | N | 1000 | SC | minocycline  | 20 | PEP | IM | 4  | 24 | 7 | 0  |  |  |    |
| Pomerantsev, 1992 [4] | H | 10 | H-7         | N | 1000 | SC | minocycline  | 20 | PEP | IM | 8  | 24 | 7 | 0  |  |  |    |
| Pomerantsev, 1992 [4] | H | 10 | H-7         | N | 1000 | SC | minocycline  | 20 | PEP | IM | 16 | 24 | 7 | 0  |  |  |    |
| Pomerantsev, 1992 [4] | M | 10 | H-7 (pBC16) | Y | 10   | SC | control      |    |     |    |    |    |   |    |  |  | 1  |
| Pomerantsev, 1992 [4] | M | 10 | H-7 (pBC16) | Y | 10   | SC | tetracycline | 3  | PEP | IM | 32 | 24 | 5 | 3  |  |  |    |
| Pomerantsev, 1992 [4] | M | 10 | H-7 (pBC16) | Y | 10   | SC | tetracycline | 20 | PEP | IM | 32 | 24 | 7 | 4  |  |  |    |
| Pomerantsev, 1992 [4] | M | 10 | H-7 (pBC16) | Y | 100  | SC | control      |    |     |    |    |    |   |    |  |  | 6  |
| Pomerantsev, 1992 [4] | M | 10 | H-7 (pBC16) | Y | 100  | SC | tetracycline | 3  | PEP | IM | 32 | 24 | 5 | 8  |  |  |    |
| Pomerantsev, 1992 [4] | M | 10 | H-7 (pBC16) | Y | 100  | SC | tetracycline | 20 | PEP | IM | 32 | 24 | 7 | 7  |  |  |    |
| Pomerantsev, 1992 [4] | M | 10 | H-7 (pBC16) | Y | 1000 | SC | control      |    |     |    |    |    |   |    |  |  | 10 |
| Pomerantsev, 1992 [4] | M | 10 | H-7 (pBC16) | Y | 1000 | SC | tetracycline | 3  | PEP | IM | 32 | 24 | 5 | 9  |  |  |    |
| Pomerantsev, 1992 [4] | M | 10 | H-7 (pBC16) | Y | 1000 | SC | tetracycline | 20 | PEP | IM | 32 | 24 | 7 | 9  |  |  |    |
| Pomerantsev, 1992 [4] | H | 10 | H-7 (pBC16) | Y | 10   | SC | control      |    |     |    |    |    |   |    |  |  | 8  |
| Pomerantsev, 1992 [4] | H | 10 | H-7 (pBC16) | Y | 10   | SC | tetracycline | 20 | PEP | IM | 4  | 24 | 7 | 9  |  |  |    |
| Pomerantsev, 1992 [4] | H | 10 | H-7 (pBC16) | Y | 10   | SC | tetracycline | 20 | PEP | IM | 8  | 24 | 7 | 9  |  |  |    |
| Pomerantsev, 1992 [4] | H | 10 | H-7 (pBC16) | Y | 10   | SC | tetracycline | 20 | PEP | IM | 16 | 24 | 7 | 8  |  |  |    |

|                       |     |    |             |   |          |         |     |                       |    |     |    |       |    |    |     |   |
|-----------------------|-----|----|-------------|---|----------|---------|-----|-----------------------|----|-----|----|-------|----|----|-----|---|
| Pomerantsev, 1992 [4] | H   | 10 | H-7 (pBC16) | Y |          | 10      | SC  | doxycycline           | 20 | PEP | IM | 4     | 24 | 7  | 8   |   |
| Pomerantsev, 1992 [4] | H   | 10 | H-7 (pBC16) | Y |          | 10      | SC  | doxycycline           | 20 | PEP | IM | 8     | 24 | 7  | 9   |   |
| Pomerantsev, 1992 [4] | H   | 10 | H-7 (pBC16) | Y |          | 10      | SC  | doxycycline           | 20 | PEP | IM | 16    | 24 | 7  | 9   |   |
| Pomerantsev, 1992 [4] | H   | 10 | H-7 (pBC16) | Y |          | 10      | SC  | minocycline           | 20 | PEP | IM | 2     | 24 | 7  | 2   |   |
| Pomerantsev, 1992 [4] | H   | 10 | H-7 (pBC16) | Y |          | 10      | SC  | minocycline           | 20 | PEP | IM | 4     | 24 | 7  | 2   |   |
| Pomerantsev, 1992 [4] | H   | 10 | H-7 (pBC16) | Y |          | 10      | SC  | minocycline           | 20 | PEP | IM | 8     | 24 | 7  | 0   |   |
| Pomerantsev, 1992 [4] | H   | 10 | H-7 (pBC16) | Y |          | 10      | SC  | minocycline           | 20 | PEP | IM | 16    | 24 | 7  | 0   |   |
| Pomerantsev, 1992 [4] | H   | 10 | H-7 (pBC16) | Y |          | 100     | SC  | control               |    |     |    |       |    |    | 10  |   |
| Pomerantsev, 1992 [4] | H   | 10 | H-7 (pBC16) | Y |          | 100     | SC  | tetracycline          | 20 | PEP | IM | 4     | 24 | 7  | 10  |   |
| Pomerantsev, 1992 [4] | H   | 10 | H-7 (pBC16) | Y |          | 100     | SC  | tetracycline          | 20 | PEP | IM | 8     | 24 | 7  | 10  |   |
| Pomerantsev, 1992 [4] | H   | 10 | H-7 (pBC16) | Y |          | 100     | SC  | tetracycline          | 20 | PEP | IM | 16    | 24 | 7  | 10  |   |
| Pomerantsev, 1992 [4] | H   | 10 | H-7 (pBC16) | Y |          | 100     | SC  | doxycycline           | 20 | PEP | IM | 4     | 24 | 7  | 10  |   |
| Pomerantsev, 1992 [4] | H   | 10 | H-7 (pBC16) | Y |          | 100     | SC  | doxycycline           | 20 | PEP | IM | 8     | 24 | 7  | 10  |   |
| Pomerantsev, 1992 [4] | H   | 10 | H-7 (pBC16) | Y |          | 100     | SC  | doxycycline           | 20 | PEP | IM | 16    | 24 | 7  | 10  |   |
| Pomerantsev, 1992 [4] | H   | 10 | H-7 (pBC16) | Y |          | 100     | SC  | minocycline           | 20 | PEP | IM | 2     | 24 | 7  | 10  |   |
| Pomerantsev, 1992 [4] | H   | 10 | H-7 (pBC16) | Y |          | 100     | SC  | minocycline           | 20 | PEP | IM | 4     | 24 | 7  | 10  |   |
| Pomerantsev, 1992 [4] | H   | 10 | H-7 (pBC16) | Y |          | 100     | SC  | minocycline           | 20 | PEP | IM | 8     | 24 | 7  | 0   |   |
| Pomerantsev, 1992 [4] | H   | 10 | H-7 (pBC16) | Y |          | 100     | SC  | minocycline           | 20 | PEP | IM | 16    | 24 | 7  | 0   |   |
| Pomerantsev, 1992 [4] | H   | 10 | H-7 (pBC16) | Y |          | 1000    | SC  | control               |    |     |    |       |    |    | 10  |   |
| Pomerantsev, 1992 [4] | H   | 10 | H-7 (pBC16) | Y |          | 1000    | SC  | tetracycline          | 20 | PEP | IM | 4     | 24 | 7  | 10  |   |
| Pomerantsev, 1992 [4] | H   | 10 | H-7 (pBC16) | Y |          | 1000    | SC  | tetracycline          | 20 | PEP | IM | 8     | 24 | 7  | 10  |   |
| Pomerantsev, 1992 [4] | H   | 10 | H-7 (pBC16) | Y |          | 1000    | SC  | tetracycline          | 20 | PEP | IM | 16    | 24 | 7  | 10  |   |
| Pomerantsev, 1992 [4] | H   | 10 | H-7 (pBC16) | Y |          | 1000    | SC  | doxycycline           | 20 | PEP | IM | 4     | 24 | 7  | 10  |   |
| Pomerantsev, 1992 [4] | H   | 10 | H-7 (pBC16) | Y |          | 1000    | SC  | doxycycline           | 20 | PEP | IM | 8     | 24 | 7  | 10  |   |
| Pomerantsev, 1992 [4] | H   | 10 | H-7 (pBC16) | Y |          | 1000    | SC  | doxycycline           | 20 | PEP | IM | 16    | 24 | 7  | 10  |   |
| Pomerantsev, 1992 [4] | H   | 10 | H-7 (pBC16) | Y |          | 1000    | SC  | minocycline           | 20 | PEP | IM | 2     | 24 | 7  | 10  |   |
| Pomerantsev, 1992 [4] | H   | 10 | H-7 (pBC16) | Y |          | 1000    | SC  | minocycline           | 20 | PEP | IM | 4     | 24 | 7  | 10  |   |
| Pomerantsev, 1992 [4] | H   | 10 | H-7 (pBC16) | Y |          | 1000    | SC  | minocycline           | 20 | PEP | IM | 8     | 24 | 7  | 8   |   |
| Pomerantsev, 1992 [4] | H   | 10 | H-7 (pBC16) | Y |          | 1000    | SC  | minocycline           | 20 | PEP | IM | 16    | 24 | 7  | 0   |   |
| Friedlander, 1993 [5] | NHP | 10 | Vollum 1B   | N | 8        | 400000  | HOA | control               |    |     | IM |       | 12 | 30 | 70  | 9 |
| Friedlander, 1993 [5] | NHP | 10 | Vollum 1B   | N | 8        | 400000  | HOA | procaine penicillin G | 24 | PEP | IM | 38298 | 12 | 30 | 70  | 3 |
| Friedlander, 1993 [5] | NHP | 9  | Vollum 1B   | N | 8        | 400000  | HOA | ciprofloxacin         | 24 | PEP | PO | 27    | 12 | 30 | 70  | 1 |
| Friedlander, 1993 [5] | NHP | 10 | Vollum 1B   | N | 8        | 400000  | HOA | doxycycline           | 24 | PEP | PO | 6     | 12 | 30 | 70  | 1 |
| Kalns, 2002 [6]       | M   | 10 | Sterne      | N |          | 5000000 | SC  | control               |    |     | IP |       | 24 | 1  | 14  | 8 |
| Kalns, 2002 [6]       | M   | 10 | Sterne      | N |          | 5000000 | SC  | doxycycline           | 48 | Rx  | IP | 1.5   | 24 | 1  | 14  | 9 |
| Heine, 2006 [7]       | M   | 10 | Ames        | N | (50-100) |         | WBA | ciprofloxacin         | 24 | PEP | IP | 60    | 12 | 21 | 45  | 1 |
| Heine, 2006 [7]       | M   | 10 | Ames        | N | (50-100) |         | WBA | control               |    |     |    |       |    |    | 45  | 9 |
| Kao, 2006 [8]         | NHP | 10 | Ames        | N | 44       |         | HOA | control               |    |     |    |       |    |    | 100 | 9 |
| Kao, 2006 [8]         | NHP | 10 | Ames        | N | 49       |         | HOA | ciprofloxacin         | 24 | PEP | PO | 32    | 12 | 30 | 100 | 2 |
| Kao, 2006 [8]         | NHP | 10 | Ames        | N | 56       |         | HOA | levofloxacin          | 24 | PEP | PO | 19    | 24 | 30 | 100 | 1 |
| Heine, 2007 [9]       | M   | 10 | Ames        | N | 50       |         | WBA | ciprofloxacin         | 24 | PEP | IP | 60    | 12 | 14 | 60  | 2 |
| Heine, 2007 [9]       | M   | 10 | Ames        | N | 50       |         | WBA | doxycycline           | 24 | PEP | IP | 160   | 6  | 14 | 60  | 1 |
| Heine, 2007 [9]       | M   | 10 | Ames        | N | 50       |         | WBA | ciprofloxacin         | 24 | PEP | IP | 60    | 12 | 21 | 60  | 0 |
| Heine, 2007 [9]       | M   | 10 | Ames        | N | 50       |         | WBA | doxycycline           | 24 | PEP | IP | 160   | 6  | 21 | 60  | 3 |
| Heine, 2007 [9]       | M   | 10 | Ames        | N | 50       |         | WBA | ciprofloxacin         | 36 | Rx  | IP | 60    | 12 | 21 | 60  | 2 |
| Heine, 2007 [9]       | M   | 10 | Ames        | N | 50       |         | WBA | ciprofloxacin         | 48 | Rx  | IP | 60    | 12 | 21 | 60  | 1 |



|                     |   |    |                |   |          |          |     |               |    |     |    |      |    |    |    |    |
|---------------------|---|----|----------------|---|----------|----------|-----|---------------|----|-----|----|------|----|----|----|----|
| Heine, 2007 [9]     | M | 10 | Ames           | N | 50       |          | WBA | control       |    |     |    |      | 12 | 21 | 60 | 9  |
| Heine, 2008 [10]    | M | 10 | Ames           | N | (50-75)  |          | A   | ciprofloxacin | 24 | PEP | IP | 60   | 12 | 14 | 30 | 1  |
| Heine, 2008 [10]    | M | 10 | Ames           | N | (50-75)  |          | A   | oritavancin   | 24 | PEP | IP | 15   | 48 | 14 | 35 | 0  |
| Heine, 2008 [10]    | M | 10 | Ames           | N | (50-75)  |          | A   | control       |    |     |    |      |    |    | 30 | 10 |
| Heine, 2008 [10]    | M | 10 | Ames           | N | (50-75)  |          | A   | oritavancin   | 24 | PEP | IP | 0.05 | 48 | 14 | 30 | 10 |
| Heine, 2008 [10]    | M | 10 | Ames           | N | (50-75)  |          | A   | oritavancin   | 24 | PEP | IP | 0.15 | 48 | 14 | 30 | 7  |
| Heine, 2008 [10]    | M | 10 | Ames           | N | (50-75)  |          | A   | oritavancin   | 24 | PEP | IP | 0.5  | 48 | 14 | 30 | 5  |
| Heine, 2008 [10]    | M | 10 | Ames           | N | (50-75)  |          | A   | oritavancin   | 24 | PEP | IP | 1.5  | 48 | 14 | 30 | 0  |
| Heine, 2008 [10]    | M | 10 | Ames           | N | (50-75)  |          | A   | oritavancin   | 24 | PEP | IP | 5    | 48 | 14 | 30 | 0  |
| Heine, 2008 [10]    | M | 10 | Ames           | N | (50-75)  |          | A   | oritavancin   | 24 | PEP | IV | 5    | 24 | 1  | 30 | 6  |
| Heine, 2008 [10]    | M | 10 | Ames           | N | (50-75)  |          | A   | oritavancin   | 24 | PEP | IV | 15   | 24 | 1  | 30 | 3  |
| Heine, 2008 [10]    | M | 10 | Ames           | N | (50-75)  |          | A   | oritavancin   | 24 | PEP | IV | 50   | 24 | 1  | 30 | 0  |
| Heine, 2008 [10]    | M | 10 | Ames           | N | (50-75)  |          | A   | oritavancin   | 36 | Rx  | IP | 5    | 48 | 14 | 35 | 1  |
| Heine, 2008 [10]    | M | 10 | Ames           | N | (50-75)  |          | A   | oritavancin   | 48 | Rx  | IP | 5    | 48 | 14 | 35 | 5  |
| Heine, 2008 [10]    | M | 10 | Ames           | N | (50-75)  |          | A   | oritavancin   | 24 | PEP | IP | 15   | 48 | 14 | 35 | 0  |
| Heine, 2008 [10]    | M | 10 | Ames           | N | (50-75)  |          | A   | ciprofloxacin | 36 | Rx  | IP | 60   | 12 | 14 | 35 | 3  |
| Heine, 2008 [10]    | M | 10 | Ames           | N | (50-75)  |          | A   | ciprofloxacin | 48 | Rx  | IP | 60   | 12 | 14 | 35 | 2  |
| Heine, 2008 [10]    | M | 9  | Ames           | N | (50-75)  |          | A   | oritavancin   | 42 | Rx  | IV | 50   | 24 | 1  | 35 | 4  |
| Gill, 2010 [11]     | M | 10 | Ames bla1/bla2 | N | 100      |          | A   | control       |    |     | IP |      | 12 | 14 | 27 | 10 |
| Gill, 2010 [11]     | M | 10 | Ames bla1/bla2 | N | 100      |          | A   | ciprofloxacin | 24 | PEP | IP | 60   | 12 | 14 | 27 | 1  |
| Heine, 2010 [12]    | M | 10 | Ames           | N | (50-100) |          | A   | control       |    |     | IP |      | 12 | 14 | 42 | 10 |
| Heine, 2010 [12]    | M | 10 | Ames           | N | (50-100) |          | A   | ciprofloxacin | 24 | PEP | IP | 60   | 12 | 14 | 42 | 0  |
| Heine, 2010 [12]    | M | 10 | Ames           | N | (50-100) |          | A   | dalbavancin   | 24 | PEP | IP | 10   | 36 | 14 | 42 | 0  |
| Heine, 2010 [12]    | M | 10 | Ames           | N | (50-100) |          | A   | dalbavancin   | 24 | PEP | IP | 20   | 36 | 14 | 42 | 2  |
| Heine, 2010 [12]    | M | 10 | Ames           | N | (50-100) |          | A   | dalbavancin   | 24 | PEP | IP | 40   | 36 | 14 | 42 | 0  |
| Heine, 2010 [12]    | M | 10 | Ames           | N | (50-100) |          | A   | dalbavancin   | 24 | PEP | IP | 80   | 36 | 14 | 42 | 0  |
| Heine, 2010 [12]    | M | 10 | Ames           | N | (50-100) |          | A   | dalbavancin   | 24 | PEP | IP | 10   | 72 | 14 | 42 | 1  |
| Heine, 2010 [12]    | M | 10 | Ames           | N | (50-100) |          | A   | dalbavancin   | 24 | PEP | IP | 20   | 72 | 14 | 42 | 0  |
| Heine, 2010 [12]    | M | 10 | Ames           | N | (50-100) |          | A   | dalbavancin   | 24 | PEP | IP | 40   | 72 | 14 | 42 | 0  |
| Heine, 2010 [12]    | M | 10 | Ames           | N | (50-100) |          | A   | dalbavancin   | 24 | PEP | IP | 80   | 72 | 14 | 42 | 2  |
| Heine, 2010 [12]    | M | 10 | Ames           | N | (50-100) |          | A   | dalbavancin   | 36 | Rx  | IP | 40   | 36 | 14 | 42 | 1  |
| Heine, 2010 [12]    | M | 7  | Ames           | N | (50-100) |          | A   | dalbavancin   | 36 | Rx  | IP | 40   | 72 | 14 | 42 | 2  |
| Heine, 2010 [12]    | M | 4  | Ames           | N | (50-100) |          | A   | ciprofloxacin | 48 | Rx  | IP | 60   | 12 | 14 | 42 | 0  |
| Heine, 2010 [12]    | M | 10 | Ames           | N | (50-100) |          | A   | dalbavancin   | 48 | Rx  | IP | 40   | 36 | 14 | 42 | 0  |
| Heine, 2010 [12]    | M | 6  | Ames           | N | (50-100) |          | A   | dalbavancin   | 48 | Rx  | IP | 40   | 72 | 14 | 42 | 1  |
| Heine, 2010 [13]    | M | 10 | Ames           | N | (75-100) |          | A   | ciprofloxacin | 24 | PEP | IP | 60   | 12 | 14 | 43 | 2  |
| Heine, 2010 [13]    | M | 10 | Ames           | N | (75-100) |          | A   | control       |    |     | SC |      | 12 | 14 | 43 | 9  |
| Heine, 2010 [13]    | M | 10 | Ames           | N | (75-100) |          | A   | ciprofloxacin | 24 | PEP | IP | 60   | 12 | 21 | 43 | 1  |
| Heine, 2010 [13]    | M | 10 | Ames           | N | (75-100) |          | A   | daptomycin    | 24 | PEP | SC | 100  | 12 | 21 | 43 | 1  |
| Peterson, 2010 [14] | R | 5  | Ames           | N | 100      | 10000000 | IN  | control       |    |     | IM |      | 12 | 6  | 13 | 5  |
| Peterson, 2010 [14] | R | 7  | Ames           | N | 100      | 10000000 | IN  | control       |    |     | IM |      | 24 | 6  | 25 | 6  |
| Peterson, 2010 [14] | R | 5  | Ames           | N | 100      | 10000000 | IN  | control       |    |     | IM |      | 24 | 6  | 22 | 5  |
| Peterson, 2010 [14] | R | 5  | Ames           | N | 100      | 10000000 | IN  | levofloxacin  | 48 | Rx  | IM | 14   | 24 | 6  | 22 | 3  |
| Peterson, 2010 [14] | R | 5  | Ames           | N | 100      | 10000000 | IN  | levofloxacin  | 57 | Rx  | IM | 14   | 24 | 6  | 22 | 5  |
| Peterson, 2010 [14] | R | 5  | Ames           | N | 100      | 10000000 | IN  | levofloxacin  | 72 | Rx  | IM | 14   | 24 | 6  | 22 | 5  |
| Peterson, 2010 [14] | R | 5  | Ames           | N | 100      | 10000000 | IN  | levofloxacin  | 96 | Rx  | IM | 14   | 24 | 6  | 22 | 5  |

|                                          |     |     |                   |   |           |                   |     |                         |       |     |    |     |    |    |    |    |     |
|------------------------------------------|-----|-----|-------------------|---|-----------|-------------------|-----|-------------------------|-------|-----|----|-----|----|----|----|----|-----|
| Yee, 2010 [15]                           | R   | 8   | Ames              | N | 143       |                   | HOA | control                 | PA    |     | IV |     | 12 | 5  | 28 | 8  |     |
| Yee, 2010 [15]                           | R   | 7   | Ames              | N | 101       |                   | HOA | levofloxacin            | PA    | Rx  | IV | 13  | 12 | 5  | 28 | 2  |     |
| Yee, 2010 [15]                           | R   | 8   | Ames              | N | 136       |                   | HOA | levofloxacin            | PA    | Rx  | IV | 25  | 12 | 5  | 28 | 1  |     |
| Nelson, 2011 [16]                        | NHP | 6   | Ames              | N | 5         | 126000            | HOA | ciprofloxacin           | 9     | PEP |    | 35  | 12 | 10 | 31 | 2  |     |
| Nelson, 2011 [16]                        | NHP | 2   | Ames              | N | 5         | 140000            | HOA | control                 |       |     |    |     |    |    |    | 31 | 2   |
| Weiss, 2011 [17]                         | GP  | 9   | Vollum ATCC 14578 | N | 75        | 3000000           | IN  | control                 | 24    |     |    |     |    |    |    |    | 9   |
| Weiss, 2011 [17]                         | GP  | 70  | Vollum ATCC 14578 | N | 75        | 3000000           | IN  | doxycycline             | 30    | Rx  |    | 20  | 12 | 21 | 50 | 24 |     |
| Weiss, 2011 [17]                         | GP  | 59  | Vollum ATCC 14578 | N | 75        | 3000000           | IN  | ciprofloxacin           | 30    | Rx  |    | 20  | 12 | 21 | 50 | 26 |     |
| Weiss, 2011 [17]                         | R   | 26  | Vollum ATCC 14578 | N | 10        | (2000000-6000000) | IN  | doxycycline             | bact  | Rx  | PO | 30  | 12 | 14 | 44 | 15 |     |
| Weiss, 2011 [17]                         | R   | 48  | Vollum ATCC 14578 | N | 10        |                   | IN  | ciprofloxacin           | bact  | Rx  | PO | 60  | 12 | 14 | 44 | 30 |     |
| Leffel, 2012 [18]                        | R   | 18  | Ames              | N | 256       |                   | NOA | levofloxacin            | 9     | PEP | PO | 50  | 24 | 7  | 30 | 8  |     |
| Leffel, 2012 [18]                        | R   | 10  | Ames              | N | 256       |                   | NOA | control                 |       |     | PO |     | 24 | 7  |    | 10 |     |
| Watkins, 2013 <sup>c</sup>               | NHP | 6   | Ames              | N | 159       | (135-252)         | HOA | clarithromycin          | 24    | PEP | PO | 60  | 12 | 30 | 75 | 2  |     |
| Watkins, 2013 <sup>c</sup>               | NHP | 6   | Ames              | N | 109       | (86-135)          | HOA | azithromycin            | 24    | PEP | PO | 3.8 | 24 | 29 | 75 | 3  |     |
| Watkins, 2013 <sup>c</sup>               | NHP | 4   | Ames              | N | 124       | (90-158)          | HOA | levofloxacin            | 24    | PEP | PO | 4   | 24 | 30 | 75 | 2  |     |
| Watkins, 2013 <sup>c</sup>               | NHP | 4   | Ames              | N | 234       | (135-327)         | HOA | control                 |       |     | PO |     | 12 | 30 | 75 | 4  |     |
| Batelle, 2014 <sup>c</sup>               | R   | 4   | Ames              | N | 200       |                   | HOA | control                 |       |     |    |     |    |    |    | 5  | 4   |
| Batelle, 2014 <sup>c</sup>               | R   | 10  | Ames              | N | 200       |                   | HOA | eravacycline            | fever | Rx  | IV | 0.8 | 24 | 28 | 56 | 0  |     |
| Batelle, 2014 <sup>c</sup>               | R   | 10  | Ames              | N | 200       |                   | HOA | eravacycline            | fever | Rx  | IV | 1.6 | 24 | 28 | 56 | 0  |     |
| Kammanadiminti, 2014 [19]                | R   | 8   | Ames              | N | 178       |                   | A   | control                 |       |     |    |     |    |    |    | 30 | 8   |
| Kammanadiminti, 2014 [19]                | R   | 8   | Ames              | N | 178       |                   | A   | levofloxacin            | 30    | Rx  | PO | 50  | 24 | 3  | 30 | 0  |     |
| Kammanadiminti, 2014 [19]                | R   | 8   | Ames              | N | 178       |                   | A   | levofloxacin            | 36    | Rx  | PO | 50  | 24 | 3  | 30 | 0  |     |
| Kammanadiminti, 2014 [19]                | R   | 8   | Ames              | N | 178       |                   | A   | levofloxacin            | 48    | Rx  | PO | 50  | 24 | 3  | 30 | 0  |     |
| Kammanadiminti, 2014 [19]                | R   | 8   | Ames              | N | 178       |                   | A   | levofloxacin            | 60    | Rx  | PO | 50  | 24 | 3  | 30 | 1  |     |
| Kammanadiminti, 2014 [19]                | R   | 18  | Ames              | N | 282       |                   | A   | control                 |       |     | PO |     |    |    |    | 32 | 18  |
| Kammanadiminti, 2014 [19]                | R   | 10  | Ames              | N | 282       |                   | A   | levofloxacin            | 60    | Rx  | PO | 50  | 24 | 3  | 32 | 1  |     |
| Kammanadiminti, 2014 [19]                | R   | 20  | Ames              | N | 282       |                   | A   | levofloxacin            | 72    | Rx  | PO | 50  | 24 | 3  | 32 | 9  |     |
| Kammanadiminti, 2014 [19]                | R   | 9   | Ames              | N | 282       |                   | A   | levofloxacin            | 84    | Rx  | PO | 50  | 24 | 3  | 32 | 6  |     |
| Kammanadiminti, 2014 [19]                | R   | 8   | Ames              | N | 282       |                   | A   | levofloxacin            | 96    | Rx  | PO | 50  | 24 | 3  | 32 | 6  |     |
| Public Health England, 2014 <sup>c</sup> | NHP | 4   | Ames              | N | 413       | (356-485)         | A   | amoxicillin-clavulanate | 24    | PEP | PO | 27  | 12 | 28 | 88 | 0  |     |
| Public Health England, 2014 <sup>c</sup> | NHP | 2   | Ames              | N | 421       | (307-534)         | A   | control                 |       |     | PO |     | 12 | 28 | 10 | 2  |     |
| Migone, 2015 [20]                        | R   | 104 | Ames              | N | 189       | (86-305)          | A   | control                 |       |     |    |     |    |    |    | 35 | 104 |
| Migone, 2015 [20]                        | R   | 37  | Ames              | N | 174       | (83-277)          | A   | levofloxacin            | 84    | Rx  | PO | 50  | 24 | 3  | 35 | 13 |     |
| Public Health England, 2015 <sup>c</sup> | NHP | 4   | Ames              | N | (194-324) |                   | A   | control                 |       |     | PO |     | 12 | 28 | 8  | 4  |     |
| Public Health England, 2015 <sup>c</sup> | NHP | 5   | Ames              | N | (291-647) |                   | A   | amoxicillin-clavulanate | 24    | PEP | PO | 27  | 12 | 28 | 88 | 0  |     |
| Public Health England, 2015 <sup>c</sup> | NHP | 2   | Ames              | N | (259-409) |                   | A   | amoxicillin             | 24    | PEP | PO | 27  | 12 | 28 | 88 | 0  |     |
| Public Health England, 2015 <sup>c</sup> | NHP | 4   | Ames              | N | (210-388) |                   | A   | control                 |       |     | PO |     | 12 | 28 | 8  | 4  |     |
| Public Health England, 2015 <sup>c</sup> | NHP | 8   | Ames              | N | (210-372) |                   | A   | amoxicillin             | 24    | PEP | PO | 27  | 12 | 28 | 88 | 0  |     |
| Weiss, 2015 [21]                         | R   | 4   | Vollum ATCC 14578 | N | 100       | (2000000-6000000) | IN  | control                 |       |     |    |     |    |    |    | 30 | 4   |

|                         |     |    |                   |   |                   |                   |     |                         |    |     |    |     |    |    |    |    |
|-------------------------|-----|----|-------------------|---|-------------------|-------------------|-----|-------------------------|----|-----|----|-----|----|----|----|----|
| Weiss, 2015 [21]        | R   | 16 | Vollum ATCC 14578 | N | 100               | (2000000-6000000) | IN  | amoxicillin-clavulanate | 32 | Rx  | SC | 200 | 12 | 14 | 30 | 4  |
| Weiss, 2015 [21]        | R   | 23 | Vollum ATCC 14578 | N | 100               | (2000000-6000000) | IN  | vancomycin              | 32 | Rx  | SC | 80  | 12 | 14 | 30 | 3  |
| Weiss, 2015 [21]        | R   | 19 | Vollum ATCC 14578 | N | 100               | (2000000-6000000) | IN  | imipenem                | 32 | Rx  | SC | 40  | 12 | 14 | 30 | 2  |
| Weiss, 2015 [21]        | R   | 19 | Vollum ATCC 14578 | N | 100               | (2000000-6000000) | IN  | rifampin                | 32 | Rx  | PO | 100 | 12 | 14 | 30 | 14 |
| Weiss, 2015 [21]        | R   | 32 | Vollum ATCC 14578 | N | 100               | (2000000-6000000) | IN  | clarithromycin          | 32 | Rx  | PO | 160 | 12 | 14 | 30 | 20 |
| Weiss, 2015 [21]        | R   | 15 | Vollum ATCC 14578 | N | 100               | (2000000-6000000) | IN  | linezolid               | 32 | Rx  | PO | 100 | 12 | 14 | 30 | 5  |
| Weiss, 2015 [21]        | R   | 16 | Vollum ATCC 14578 | N | (100-200)         |                   | IN  | ciprofloxacin           | 32 | Rx  | PO | 120 | 12 | 14 | 30 | 11 |
| Grossman, 2017 [22]     | M   | 9  | Ames              | N | 18                |                   | NOA | control                 |    |     |    |     | 24 | 21 | 60 | 7  |
| Grossman, 2017 [22]     | M   | 13 | Ames              | N | 18                |                   | NOA | doxycycline             | 24 | PEP | IP | 80  | 12 | 21 | 60 | 9  |
| Grossman, 2017 [22]     | M   | 10 | Ames              | N | 88                |                   | NOA | control                 |    |     |    |     |    |    | 62 | 9  |
| Grossman, 2017 [22]     | M   | 13 | Ames              | N | 88                |                   | NOA | doxycycline             | 48 | Rx  | IP | 80  | 12 | 21 | 62 | 5  |
| Heine, 2017 [23]        | M   | 10 | Cip-R Ames        | Y | (7-32)            |                   | WBA | control                 |    |     | IP |     | 12 | 14 | 28 | 9  |
| Heine, 2017 [23]        | M   | 10 | Cip-R Ames        | Y | (7-32)            |                   | WBA | ciprofloxacin           | 36 | Rx  | IP | 60  | 12 | 14 | 28 | 7  |
| Slay, 2017 <sup>a</sup> | M   | 32 | Ames              | N | 200               |                   | A   | levofloxacin            | 24 | PEP | PO | 80  | 6  | 14 | 30 | 15 |
| Slay, 2017 <sup>a</sup> | M   | 32 | Ames              | N | 200               |                   | A   | azithromycin            | 24 | PEP | PO | 6   | 6  | 13 | 30 | 32 |
| Slay, 2017 <sup>a</sup> | M   | 32 | Ames              | N | 200               |                   | A   | clarithromycin          | 24 | PEP | PO | 30  | 12 | 14 | 30 | 32 |
| Slay, 2017 <sup>a</sup> | M   | 32 | Ames              | N | 200               |                   | A   | amoxicillin             | 24 | PEP | PO | 30  | 8  | 14 |    | 7  |
| Slay, 2017 <sup>a</sup> | M   | 32 | Ames              | N | 200               |                   | A   | amoxicillin-clavulanate | 24 | PEP | PO | 30  | 8  | 14 | 30 | 6  |
| Slay, 2017 <sup>a</sup> | M   | 80 | Ames              | N | 200               |                   | A   | control                 |    |     |    |     |    |    | 30 | 80 |
| Slay, 2017 <sup>a</sup> | M   | 15 | Ames              | N | 200               |                   | A   | control                 |    |     |    |     |    |    | 30 | 15 |
| Slay, 2017 <sup>a</sup> | M   | 15 | Ames              | N | 200               |                   | A   | levofloxacin            |    |     | PO | 160 | 12 | 30 | 30 | 0  |
| Slay, 2017 <sup>a</sup> | M   | 15 | Ames              | N | 200               |                   | A   | azithromycin            |    |     | PO | 12  | 12 | 29 | 30 | 14 |
| Slay, 2017 <sup>a</sup> | M   | 15 | Ames              | N | 200               |                   | A   | clarithromycin          |    |     | PO | 60  | 12 | 30 | 30 | 15 |
| Slay, 2017 <sup>a</sup> | M   | 15 | Ames              | N | 200               |                   | A   | amoxicillin             |    |     | PO | 60  | 12 | 30 | 30 | 1  |
| Slay, 2017 <sup>a</sup> | M   | 15 | Ames              | N | 200               |                   | A   | amoxicillin-clavulanate |    |     | PO | 60  | 12 | 30 | 30 | 2  |
| Slay, 2017 <sup>a</sup> | NHP | 10 | Ames              | N | 200               |                   | A   | amoxicillin-clavulanate | 24 | PEP | PO | 27  | 12 | 28 | 60 | 0  |
| Slay, 2017 <sup>a</sup> | NHP | 10 | Ames              | N | 200               |                   | A   | control                 |    |     |    |     |    |    | 60 | 10 |
| Slay, 2017 <sup>a</sup> | NHP | 10 | Ames              | N | 200               |                   | A   | amoxicillin             | 24 | PEP | PO | 27  | 12 | 28 | 60 | 0  |
| Slay, 2017 <sup>a</sup> | NHP | 10 | Ames              | N | 200               |                   | A   | amoxicillin-clavulanate |    |     | PO | 27  | 12 | 28 | 60 | 0  |
| Slay, 2017 <sup>a</sup> | NHP | 10 | Ames              | N | 200               |                   | A   | control                 |    |     |    |     |    |    | 60 | 10 |
| Steenbergen, 2017 [24]  | M   | 10 | Ames              | N | 9.8 (7.6-12)      |                   | WBA | control                 |    |     |    |     |    |    | 38 | 6  |
| Steenbergen, 2017 [24]  | M   | 9  | Ames              | N | 9.8 (7.6-12)      |                   | WBA | ciprofloxacin           | 24 | PEP | IP | 60  | 12 | 14 | 38 | 0  |
| Steenbergen, 2017 [24]  | M   | 10 | Ames              | N | 9.8 (7.6-12)      |                   | WBA | doxycycline             | 24 | PEP | IP | 20  | 12 | 14 | 38 | 0  |
| Steenbergen, 2017 [24]  | M   | 10 | Ames              | N | 9.8 (7.6-12)      |                   | WBA | omadacycline            | 24 | PEP | IP | 10  | 12 | 14 | 38 | 0  |
| Steenbergen, 2017 [24]  | M   | 10 | Ames              | N | 9.8 (7.6-12)      |                   | WBA | omadacycline            | 24 | PEP | IP | 20  | 12 | 14 | 38 | 0  |
| Steenbergen, 2017 [24]  | M   | 10 | Ames              | N | 9.8 (7.6-12)      |                   | WBA | omadacycline            | 24 | PEP | IP | 40  | 12 | 14 | 38 | 0  |
| Steenbergen, 2017 [24]  | M   | 10 | Ames              | N | 30.53 (27.3-37.2) |                   | WBA | doxycycline             | 24 | PEP | IP | 1.5 | 12 | 14 | 40 | 8  |
| Steenbergen, 2017 [24]  | M   | 10 | Ames              | N | 30.53 (27.3-37.2) |                   | WBA | doxycycline             | 24 | PEP | IP | 5   | 12 | 14 | 40 | 3  |

|                        |     |    |      |   |                   |     |               |      |     |    |     |    |    |    |    |
|------------------------|-----|----|------|---|-------------------|-----|---------------|------|-----|----|-----|----|----|----|----|
| Steenbergen, 2017 [24] | M   | 10 | Ames | N | 30.53 (27.3-37.2) | WBA | doxycycline   | 24   | PEP | IP | 15  | 12 | 14 | 40 | 0  |
| Steenbergen, 2017 [24] | M   | 10 | Ames | N | 30.53 (27.3-37.2) | WBA | doxycycline   | 24   | PEP | IP | 30  | 12 | 14 | 40 | 0  |
| Steenbergen, 2017 [24] | M   | 10 | Ames | N | 30.53 (27.3-37.2) | WBA | omadacycline  | 24   | PEP | IP | 1.5 | 12 | 14 | 40 | 6  |
| Steenbergen, 2017 [24] | M   | 10 | Ames | N | 30.53 (27.3-37.2) | WBA | omadacycline  | 24   | PEP | IP | 5   | 12 | 14 | 40 | 2  |
| Steenbergen, 2017 [24] | M   | 10 | Ames | N | 30.53 (27.3-37.2) | WBA | omadacycline  | 24   | PEP | IP | 15  | 12 | 14 | 40 | 0  |
| Steenbergen, 2017 [24] | M   | 10 | Ames | N | 30.53 (27.3-37.2) | WBA | omadacycline  | 24   | PEP | IP | 30  | 12 | 14 | 40 | 0  |
| Steenbergen, 2017 [24] | M   | 9  | Ames | N | 30.53 (27.3-37.2) | WBA | ciprofloxacin | 24   | PEP | IP | 60  | 12 | 14 | 40 | 0  |
| Steenbergen, 2017 [24] | M   | 10 | Ames | N | 30.53 (27.3-37.2) | WBA | control       |      |     | IP |     | 12 | 14 | 40 | 10 |
| Steenbergen, 2017 [24] | M   | 10 | Ames | N | 30.5              | WBA | control       |      |     | IP |     | 12 | 14 | 40 | 10 |
| Steenbergen, 2017 [24] | M   | 10 | Ames | N | 30.5              | WBA | doxycycline   | 48   | Rx  | IP | 30  | 12 | 14 | 40 | 3  |
| Steenbergen, 2017 [24] | M   | 10 | Ames | N | 30.5              | WBA | omadacycline  | 48   | Rx  | IP | 30  | 12 | 14 | 40 | 4  |
| Steenbergen, 2017 [24] | M   | 9  | Ames | N | 30.5              | WBA | ciprofloxacin | 48   | Rx  | IP | 60  | 12 | 14 | 40 | 2  |
| Vietri, 2020 [25]      | NHP | 4  | Ames | N | 172 (35-463)      | A   | control       | bact |     |    |     |    |    | 60 | 4  |
| Vietri, 2020 [25]      | NHP | 11 | Ames | N | 172 (35-463)      | A   | ciprofloxacin | bact | Rx  | IV | 33  | 12 | 10 | 60 | 0  |
| Vietri, 2020 [25]      | NHP | 12 | Ames | N | 172 (35-463)      | A   | clindamycin   | bact | Rx  | IM | 60  | 8  | 10 | 60 | 3  |

Abbreviations: A, aerosol; bact, bacteremia; GP, guinea pig; H, hamster; HOA, head-only aerosol; IN, intranasal IN; IP, intraperitoneal; intravenous; M, mouse; N, No; NHP, nonhuman primate; PA, protective antigen; PEP, postexposure prophylaxis; R, rabbit; Rx, treatment; SC, subcutaneous; WBA, whole-body aerosol

<sup>a</sup> Unpublished data

## References for Line List

1. Barnes JM. Penicillin and B-anthraxis. *J Pathol Bacteriol* 1947; 59(1-2):113-25.
2. Henderson DW, Peacock S, Belton FC. Observations on the prophylaxis of experimental pulmonary anthrax in the monkey. *J Hyg (Lond)*. 1956 Mar;54(1):28-36.
3. Gochenour WS Jr, Gleiser CA, Tigertt WD. Observations on penicillin prophylaxis of experimental inhalation anthrax in the monkey. *J Hyg (Lond)*. 1962 Mar;60(1):29-33.
4. Pomerantsev AP, Shishkova IA, Marinin LI. The Comparison Between the Medical Effect Produced by Tetracycline Group Antibiotics in the Treatment of Anthrax Caused by Plasmid pBC16-TET Gene Inheriting Strain. *Antibiotics and Chemotherapy* 1992; 37(4):31-4.
5. Friedlander AM, Welkos SL, Pitt ML, et al. Postexposure prophylaxis against experimental inhalation anthrax. *J Infect Dis* 1993; 167(5):1239-43.
6. Kalns J, Morris J, Eggers J, Kiel J. Delayed treatment with doxycycline has limited effect on anthrax infection in BLK57/B6 mice. *Biochem Biophys Res Commun*. 2002 Sep 27;297(3):506-9.
7. Heine HS, Bassett J, Miller L, Eiznhamer D. A., Xu, Z. Q., Leski, M. L., Flavin, M. T. Susceptibility and Efficacy of Cethromycin in an Animal Model of Anthrax. In: 46th ICAAC. San Fransisco, CA, 2006.
8. Kao LM, Bush K, Barnewall R, et al. Pharmacokinetic Considerations and Efficacy of Levofloxacin in an Inhalational Anthrax (Postexposure) Rhesus Monkey Model. *Antimicrob Agents Chemother* 2006; 50(11):3535-42.
9. Heine HS, Bassett J, Miller L, et al. Determination of Antibiotic Efficacy Against *Bacillus anthracis* in a Mouse Aerosol Challenge Model. *Antimicrob Agents Chemother* 2007; 51(4):1373-9.
10. Heine HS, Bassett J, Miller L, et al. Efficacy of Oritavancin in a Murine Model of *Bacillus anthracis* Spore Inhalation Anthrax. *Antimicrob Agents Chemother* 2008; 52(9):3350-7.
11. Gill SC, Rubino CM, Bassett J, et al. Pharmacokinetic-pharmacodynamic assessment of faropenem in a lethal murine *Bacillus anthracis* inhalation postexposure prophylaxis model. *Antimicrob Agents Chemother* 2010; 54(5):1678-83.
12. Heine HS, Purcell BK, Bassett J, Miller L, Goldstein BP. Activity of Dalbavancin Against *Bacillus anthracis* In Vitro and in a Mouse Inhalation Anthrax Model. *Antimicrob Agents Chemother* 2010; 54(3):991-6.
13. Heine HS, Bassett J, Miller L, Purcell BK, Byrne WR. Efficacy of Daptomycin Against *Bacillus anthracis* in a Murine Model of Anthrax Spore Inhalation. *Antimicrob Agents Chemother* 2010; 54(10):4471-3.
14. Peterson JW, Moen ST, Healy D, et al. Protection Afforded by Fluoroquinolones in Animal Models of Respiratory Infections with *Bacillus anthracis*, *Yersinia pestis*, and *Francisella tularensis*. *Open Microbiol J* 2010; 4: 34-46.
15. Yee SB, Hatkin JM, Dyer DN, Orr SA, Pitt ML. Aerosolized *Bacillus anthracis* Infection in New Zealand White Rabbits: Natural History and Intravenous Levofloxacin Treatment. *Comp Med* 2010; 60(6): 461-8.
16. Nelson M, Stagg AJ, Stevens DJ, Brown MA, Pearce PC, Simpson AJ, Lever MS. Post-exposure therapy of inhalational anthrax in the common marmoset. *Int J Antimicrob Agents*. 2011 Jul;38(1):60-4.
17. Weiss S, Kobiler D, Levy H, Pass A, Ophir Y, Rothschild N, Tal A, Schlomovitz J, Altboum Z. Antibiotics cure anthrax in animal models. *Antimicrob Agents Chemother*. 2011 Apr;55(4):1533-42.
18. Leffel EK, Bourdage JS, Williamson ED, Duchars M, Fuerst TR, Fusco PC. Recombinant protective antigen anthrax vaccine improves survival when administered as a postexposure prophylaxis countermeasure with antibiotic in the New Zealand white rabbit model of inhalation anthrax. *Clin Vaccine Immunol*. 2012 Aug;19(8):1158-64.

19. Kammanadiminti S, Patnaikuni RK, Comer J, Meister G, Sinclair C, Kodihalli S. Combination therapy with antibiotics and anthrax immune globulin intravenous (AIGIV) is potentially more effective than antibiotics alone in rabbit model of inhalational anthrax. *PLoS One*. 2014 Sep 16;9(9):e106393.
20. Migone TS, Bolmer S, Zhong J, Corey A, Vasconcelos D, Buccellato M, Meister G. Added benefit of raxibacumab to antibiotic treatment of inhalational anthrax. *Antimicrob Agents Chemother*. 2015 Feb;59(2):1145-51.
21. Weiss S, Altboum Z, Glinert I, Schlomovitz J, Sittner A, Bar-David E, Kobiler D, Levy H. Efficacy of Single and Combined Antibiotic Treatments of Anthrax in Rabbits. *Antimicrob Agents Chemother*. 2015 Dec;59(12):7497-503.
22. Grossman TH, Anderson MS, Drabek L, et al. The Fluorocycline TP-271 Is Efficacious in Models of Aerosolized *Bacillus anthracis* Infection in BALB/c Mice and Cynomolgus Macaques. *Antimicrob Agents Chemother* 2017; 61(10).
23. Heine HS, Shadomy SV, Boyer AE, et al. Evaluation of Combination Drug Therapy for Treatment of Antibiotic-Resistant Inhalation Anthrax in a Murine Model. *Antimicrob Agents Chemother* 2017; 61(9): e00788-17.
24. Steenbergen J, Tanaka SK, Miller LL, Halasohoris SA, Hershfield JR. In Vitro and In Vivo Activity of Omadacycline against Two Biothreat Pathogens, *Bacillus anthracis* and *Yersinia pestis*. *Antimicrob Agents Chemother* 2017; 61(5): e02434-16.
25. Vietri NJ, Tobery SA, Chabot DJ, Ingavale S, Somerville BC, Miller JA, Schellhase CW, Twenhafel NA, Fetterer DP, Cote CK, Klimko CP, Boyer AE, Woolfitt AR, Barr JR, Wright ME, Friedlander AM. Clindamycin Protects Nonhuman Primates Against Inhalational Anthrax But Does Not Enhance Reduction of Circulating Toxin Levels When Combined With Ciprofloxacin. *J Infect Dis*. 2021 Feb 3;223(2):319-325.

## Supplementary Figure 3. Forest Plots for Monotherapy Studies

### Postexposure Prophylaxis

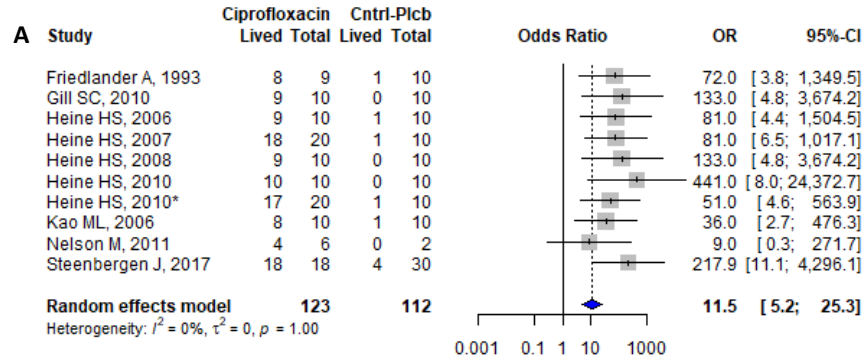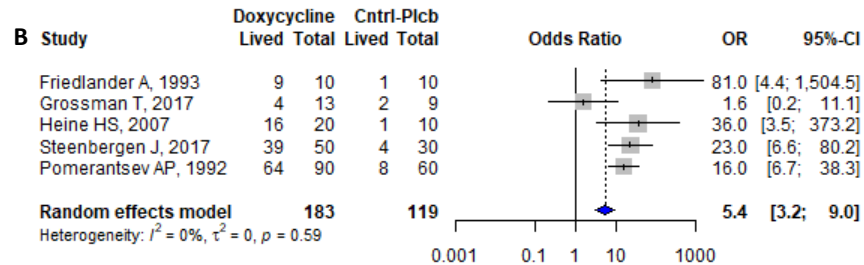

### Treatment Studies

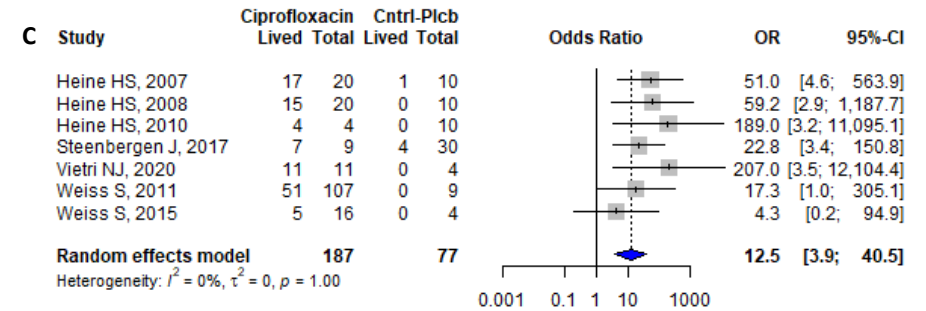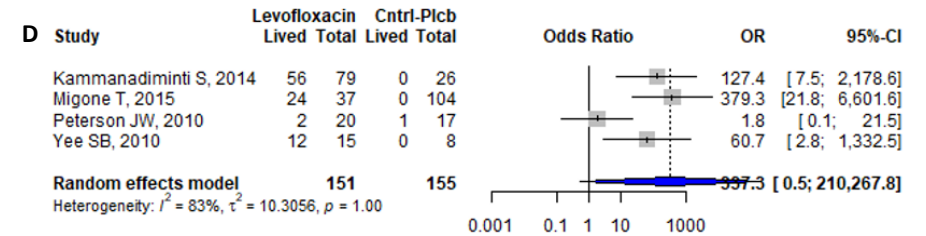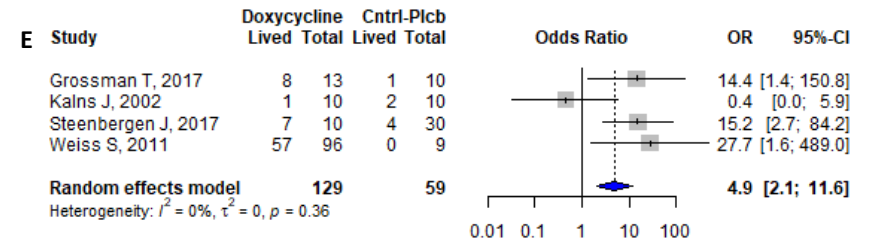

## Supplementary Text 2. Information on Monte Carlo Simulations

The purpose of these simulations was to determine drug exposures and target attainment probabilities for various antimicrobials for the treatment and postexposure prophylaxis of anthrax. The main manuscript provides an overview of the general methods employed to determine the drug exposures from published pharmacokinetic (PK) datasets as well as to predict the probabilities of attaining pharmacokinetic / pharmacodynamic (PK/PD) targets associated with survival in animal studies. While commonly employed techniques were used for these PK predictions and Monte Carlo simulations, this supplement provides additional details on the approach and results.

### METHODS

Published animal PK data from studies evaluating postexposure prophylaxis (PEPAbx) or treatment of anthrax were used to predict the average unbound drug exposures and subsequently establish exposure-response relationships. We systematically obtained the doses, dosing intervals, and routes of administration for published anthrax studies in mice, rabbits, and nonhuman primates (NHPs) [1].

Simulations were performed to predict the overall free (ie, non-protein-bound) drug exposures in plasma (i.e., the area under the unbound plasma concentration time curve, fAUC) for the dosage regimens studied in animals. Plasma protein binding was assumed to be similar in mice and humans for levofloxacin and ciprofloxacin (~30% bound), as well as for doxycycline (~80 to 90% bound) [2]. Known differences in protein binding between species were incorporated for dalbavancin (93% bound in humans vs. 98.4% in mice) [3, 4] and oritavancin (85% bound in humans vs. 93.6% in mouse serum) [5, 6].

As no PK data in anthrax-infected animals were available for  $\beta$ -lactam antibiotics, quantitative PK/PD relationships could not be established for this class of antimicrobials. For non- $\beta$ -lactam antibiotics (and especially for drugs with long half-lives), the fAUC/MIC is usually the most predictive PK/PD index for bacterial killing in mice at 24 h and for beneficial outcomes in patients [7]. To obtain the fAUC/MIC, the predicted fAUC was divided by the MIC of the *B. anthracis* strain used in the respective animal experiment [8, 9]. When determining the PK/PD targets of oritavancin, we used the reported MIC of the *B. anthracis* Ames strain (0.015 mg/L) in the presence of 0.002% polysorbate 80 [6]. Then, each fAUC/MIC was plotted against the observed mortality to identify PK/PD exposure targets associated with a high level of survival (eg,  $\geq 80\%$ ). Ciprofloxacin and dalbavancin achieved near-maximal survival at the lowest studied doses for treatment and PEPAbx. Thus, the PK/PD targets for ciprofloxacin and dalbavancin were conservative (i.e., high). The exposure-response relationship data for levofloxacin was more heterogeneous than that for ciprofloxacin. Given the similar mechanisms of action between these fluoroquinolones, the PK/PD targets from ciprofloxacin were borrowed for levofloxacin. Additionally, a more conservative AUC<sub>0-24h</sub>/MIC target of 226 (equivalent to a fAUC<sub>0-24h</sub>/MIC of 158) was considered for levofloxacin.

The exposure response data for doxycycline were sparser than those for ciprofloxacin. Thus, a range of 3 PK/PD targets was employed.

The PK/PD targets for ciprofloxacin, levofloxacin, and doxycycline are based on the AUC from 0 to 24 h (AUC<sub>0-24h</sub>). Because dalbavancin has a weekly dosing interval in humans, we calculated the AUC from 0 to 7 days (AUC<sub>0-7days</sub>) and used this drug exposure metric for PK/PD target evaluations. Likewise, due to the long half-life of oritavancin, the AUC from 0 to 14 days (AUC<sub>0-14days</sub>) was used for PK/PD target assessment. Given the sparse and heterogeneous nature of these PK/PD datasets arising from different animal species in various studies, we did not perform formal logistic regression analyses and instead considered a variety of potential PK/PD target values as described above.



To predict drug exposures (AUCs) in humans, Monte Carlo simulations with 10,000 virtual subjects for each dosage regimen were performed. Due to their long half-lives, we calculated the fAUC over weekly intervals (fAUC0-7days and fAUC7-14days) for dalbavancin in both humans and mice. For oritavancin, the fAUC from time zero to infinity (fAUC0-infinity) in humans was compared to the AUC over the entire 14-day treatment duration in mice (fAUC0-14days).

Total clearance (CL) or, for oral dosing, apparent total clearance (CL/F) is the main PK parameter determining the drug exposures (AUC), along with the administered dose. Thus, between-subject variability (ie, the coefficient of variation [CV] of CL or CL/F) was obtained from studies of healthy volunteers and patient populations, with a preference for studies employing population PK modeling. Monte Carlo simulations were performed using the smaller variability from healthy volunteers to reflect PEPAbx or the moderate variability from non-critically ill patients to reflect the early stages of anthrax infections. The simulated fAUC/MIC ratios in humans over a wide range of MICs were then compared to the PK/PD targets associated with high survival in PEPAbx or treatment studies. The fraction of virtual subjects achieving the respective PK/PD target was used to approximate the probability of target attainment (PTA) (ie, efficacy). We defined the PK/PD breakpoint for PEPAbx and treatment of anthrax patients as the highest MIC with a PTA of at least 98%. This conservative cutoff was chosen due to the life-threatening nature of systemic anthrax. The PTA vs. MIC profiles were provided, and thus PK/PD breakpoints for other cutoff values can be readily obtained from these plots.

## RESULTS

In our PK/PD analyses, ciprofloxacin AUC0-24h/MIC targets were derived from several mouse infection model studies [4, 6, 10-13]. A target of 44 (unpublished data, Henry Heine) to 68 was identified in these PEPAbx studies to yield 80% to 100% survival at all studied drug exposures, suggesting near-maximal efficacy at the lowest dose. Survival was 67% to 89% in 3 NHP studies [14-16] at AUC0-24h/MIC of 158 to 200. For treatment studies, survival rates in mice and NHPs were 70% to 100% at AUC0-24h/MIC of 68 to 564, with no apparent exposure-response relationship. Therefore, an AUC0-24h/MIC target of 44 was used for PEPAbx and an AUC0-24h/MIC target of 68 for treatment by ciprofloxacin. After accounting for 30% protein binding, these ciprofloxacin targets are equivalent to fAUC0-24h/MIC of 31 for PEPAbx and of 48 for treatment.

Monte Carlo simulations for oral ciprofloxacin used an average CL/F of 34.2 L/h [17-19]. We simulated daily ciprofloxacin doses of 1000 or 1500 mg (ie, 500 mg ciprofloxacin orally every 8 or 12 h). When using the 20% CV in CL/F, the 1000 mg daily dose of ciprofloxacin achieved robust (>98%) PTAs up to MICs of 0.25 mg/L for the AUC0-24h/MIC targets of 44 and 68. At the higher dose (1500 mg per day), robust PTAs were achieved up to 0.5 mg/L at the AUC/MIC target of 44, and up to 0.25 mg/L at the AUC0-24h/MIC target of 68. These PK/PD breakpoints were similar or slightly lower (0.125 to 0.5 mg/L) when simulating with a moderately large CV of 30% for between-subject variability in CL/F.

For levofloxacin, the achieved AUC0-24h/MIC in rabbits and NHPs ranged from 113 to 487 [15, 20-24]. Survival rates were considerably lower when treatment was initiated at 48 h or longer post infection. Thus, these late treatment onset arms were excluded from the PK/PD analysis. Survival rates for PEPAbx ranged from 50% to 90% with no obvious exposure-response relationship. One study with 90% survival in NHPs had an AUC0-24h/MIC of 233 [15]. For treatment studies in rabbits, survival was 87.5% or 100% at AUC0-24h/MIC of 218 or higher. Therefore, we used the average AUC0-24h/MIC target of 226 for levofloxacin (equivalent to a fAUC0-24h/MIC of 158), in addition to the ciprofloxacin AUC0-24h/MIC targets of 44 and 68. These ciprofloxacin and levofloxacin targets were within the range of quinolone targets for other bacterial pathogens in mice and man [7].

We simulated a once-daily dose of 750 mg oral levofloxacin with an average population mean clearance of 10 L/h and a CV of 20% or 30% [19, 25]. For the scenario with smaller variability, levofloxacin achieved robust PTAs up to an MIC of 1 mg/L at the AUC<sub>0-24h</sub>/MIC target of 44, up to an MIC of 0.5 mg/L at the AUC<sub>0-24h</sub>/MIC target of 68, and up to an MIC of 0.125 mg/L for the AUC<sub>0-24h</sub>/MIC target of 226. These PK/PD breakpoints were similar or slightly lower (0.125 to 0.5 mg/L) when we used a CL/F with a 30% CV.

For doxycycline, near-maximal efficacy in mice was observed for PEPAbx at AUC/MIC of 274 and higher [11, 13, 26]. Three studies [13, 26, 27] were available to determine PK/PD relationships for doxycycline treatment. Survival rates were 62% to 70% at AUC<sub>0-24h</sub>/MIC of 548 and 1525, whereas an AUC<sub>0-24h</sub>/MIC of 27 yielded only 10% survival. Thus, we used the AUC<sub>0-24h</sub>/MIC target of 274 for PEPAbx and of 538 and 1525 for treatment. Assuming an 85% plasma protein binding of doxycycline (i.e., unbound fraction of 0.15), these targets are equivalent to a fAUC<sub>0-24h</sub>/MIC of 41 for PEPAbx as well as of 81 and 229 for treatment.

Doxycycline clearance was simulated in two scenarios: one recent population PK analysis showed a mean CL/F of 4.63 L/h (19.3% CV) [28]; in the second scenario, we pooled several studies and obtained an average CL/F of 3.27 L/h (33.4% CV) [29, 30]. At a daily dose of 200 mg oral doxycycline, robust PTAs were achieved up to an MIC of 0.0625 mg/L for the AUC<sub>0-24h</sub>/MIC target of 274 and up to 0.031 mg/L for the AUC<sub>0-24h</sub>/MIC target of 548 in both clearance scenarios. For the more conservative treatment target of AUC<sub>0-24h</sub>/MIC of 1525, the breakpoint was 0.0156 mg/L.

For oritavancin, a clear exposure-response relationship [6] was observed for PEPAbx with near-maximal survival achieved at a fAUC<sub>0-14days</sub>/MIC of 2,363 in mice. The same study found a 90% survival at a fAUC<sub>0-14days</sub>/MIC of 7,875, when treatment was started at 36 h. When treatment was initiated later, survival was 50% to 56% (at fAUC<sub>0-14days</sub>/MIC of 6,354 or 7,875). Therefore, we used a fAUC<sub>0-14days</sub>/MIC target of 2,363 for PEPAbx. As only a narrow range of oritavancin exposures was studied for treatment by oritavancin, we used the highest studied drug exposure as a conservative target for treatment (fAUC<sub>0-14days</sub>/MIC of 7,875). For Monte Carlo simulations, we used a population mean clearance of 0.45 L/h with either a 20% or 30% CV [31-35]. A single IV dose of 1200 mg oritavancin achieved robust PTAs up to an MIC of 0.0625 mg/L for the PEPAbx target and up to an MIC of 0.031 mg/L or 0.0156 mg/L (depending on the variability in CL) for the treatment target. Of note, the *B. anthracis* Ames strain MIC of 0.015 mg/L was reported in the presence of 0.002% polysorbate 80 [6] and this MICs was used for PK/PD evaluation. Therefore, the predicted PTA vs. MIC profiles for oritavancin refer to MICs in the presence of 0.002% polysorbate 80.

One mouse study assessed the PK/PD for dalbavancin [4] and showed near maximal efficacy (survival ≥80%) at all studied fAUC<sub>0-7days</sub>/MIC, ranging from 850 to 6,800 when assessing PEPAbx. All treatment arms of the same study evaluated a fAUC<sub>0-7days</sub>/MIC of 3400 which led to survival rates of 71% to 100%. As a conservative approach, we used the fAUC<sub>0-7days</sub>/MIC target of 850 for PEPAbx and the target of 3400 for treatment. Monte Carlo simulations used an IV dose of 1000 mg dalbavancin at day 0 and of 500 mg at day 7. The fAUC from days 0 to 7 and from days 7 to 14 were calculated based on PK data from Scoble et al. [36]. The variability in CL and thus in AUC was set to 23% based on two population PK analyses [37, 38]. Additionally, we simulated a scenario with 30% CV in CL. Under both scenarios, robust PTAs were achieved up to MICs of 0.0625 mg/L for the PEPAbx target and up to 0.0156 mg/L for the conservative treatment target.

## References for Supplementary Text 2

1. Welkos S, Bozue J, Twenhafel N, Cote C. Animal Models for the Pathogenesis, Treatment, and Prevention of Infection by *Bacillus anthracis*. *Microbiol Spectr* 2015; 3(1): Tbs-0001-2012.
2. Zhou J, Tran BT, Tam VH. The complexity of minocycline serum protein binding. *J Antimicrob Chemother* 2017; 72(6): 1632-4.
3. Andes D, Craig WA. In vivo pharmacodynamic activity of the glycopeptide dalbavancin. *Antimicrob Agents Chemother* 2007; 51(5): 1633-42.
4. Heine HS, Purcell BK, Bassett J, Miller L, Goldstein BP. Activity of dalbavancin against *Bacillus anthracis* in vitro and in a mouse inhalation anthrax model. *Antimicrob Agents Chemother* 2010; 54(3): 991-6.
5. Arhin FF, Belley A, McKay G, et al. Assessment of oritavancin serum protein binding across species. *Antimicrob Agents Chemother* 2010; 54(8): 3481-3.
6. Heine HS, Bassett J, Miller L, et al. Efficacy of oritavancin in a murine model of *Bacillus anthracis* spore inhalation anthrax. *Antimicrob Agents Chemother* 2008; 52(9): 3350-7.
7. Ambrose PG, Bhavnani SM, Rubino CM, et al. Pharmacokinetics-pharmacodynamics of antimicrobial therapy: it's not just for mice anymore. *Clin Infect Dis* 2007; 44(1): 79-86.
8. Deziel MR, Heine H, Louie A, et al. Effective antimicrobial regimens for use in humans for therapy of *Bacillus anthracis* infections and postexposure prophylaxis. *Antimicrob Agents Chemother* 2005; 49(12): 5099-106.
9. Drusano GL. Antimicrobial pharmacodynamics: critical interactions of 'bug and drug'. *Nat Rev Microbiol* 2004; 2(4): 289-300.
10. Gill SC, Rubino CM, Bassett J, et al. Pharmacokinetic-pharmacodynamic assessment of faropenem in a lethal murine *Bacillus anthracis* inhalation postexposure prophylaxis model. *Antimicrob Agents Chemother* 2010; 54(5): 1678-83.
11. Heine HS, Bassett J, Miller L, et al. Determination of antibiotic efficacy against *Bacillus anthracis* in a mouse aerosol challenge model. *Antimicrob Agents Chemother* 2007; 51(4): 1373-9.
12. Heine HS, Bassett J, Miller L, Purcell BK, Byrne WR. Efficacy of Daptomycin against *Bacillus anthracis* in a murine model of anthrax spore inhalation. *Antimicrob Agents Chemother* 2010; 54(10): 4471-3.
13. Steenbergen J, Tanaka SK, Miller LL, Halasohoris SA, Hershfield JR. In Vitro and In Vivo Activity of Omadacycline against Two Biothreat Pathogens, *Bacillus anthracis* and *Yersinia pestis*. *Antimicrob Agents Chemother* 2017; 61(5).
14. Friedlander AM, Welkos SL, Pitt ML, et al. Postexposure prophylaxis against experimental inhalation anthrax. *J Infect Dis* 1993; 167(5): 1239-43.
15. Kao LM, Bush K, Barnewell R, et al. Pharmacokinetic considerations and efficacy of levofloxacin in an inhalational anthrax (postexposure) rhesus monkey model. *Antimicrob Agents Chemother* 2006; 50(11): 3535-42.
16. Nelson M, Stagg AJ, Stevens DJ, et al. Post-exposure therapy of inhalational anthrax in the common marmoset. *International Journal of Antimicrobial Agents* 2011; 38(1): 60-4.
17. Forrest A, Ballow CH, Nix DE, Birmingham MC, Schentag JJ. Development of a population pharmacokinetic model and optimal sampling strategies for intravenous ciprofloxacin. *Antimicrob Agents Chemother* 1993; 37(5): 1065-72.
18. Drusano GL, Standiford HC, Plaisance K, Forrest A, Leslie J, Caldwell J. Absolute oral bioavailability of ciprofloxacin. *Antimicrob Agents Chemother* 1986; 30(3): 444-6.
19. Bulitta JB, Kinzig M, Naber CK, et al. Population Pharmacokinetics and Penetration into Prostatic, Seminal, and Vaginal Fluid for Ciprofloxacin, Levofloxacin, and Their Combination. *Chemotherapy* 2011; 57(5): 402-16.
20. Kammanadiminti S, Patnaikuni RK, Comer J, Meister G, Sinclair C, Kodihalli S. Combination therapy with antibiotics and anthrax immune globulin intravenous (AIGIV) is potentially more effective than antibiotics alone in rabbit model of inhalational anthrax. *PLoS One* 2014; 9(9): e106393.
21. Leffel EK, Bourdage JS, Williamson ED, Duchars M, Fuerst TR, Fusco PC. Recombinant protective antigen anthrax vaccine improves survival when administered as a postexposure prophylaxis countermeasure with antibiotic in the New Zealand white rabbit model of inhalation anthrax. *Clin Vaccine Immunol* 2012; 19(8): 1158-64.
22. Yee SB, Hatkin JM, Dyer DN, Orr SA, Pitt ML. Aerosolized *Bacillus anthracis* infection in New Zealand white rabbits: natural history and intravenous levofloxacin treatment. *Comp Med* 2010; 60(6): 461-8.

23. Peterson JW, Moen ST, Healy D, et al. Protection Afforded by Fluoroquinolones in Animal Models of Respiratory Infections with *Bacillus anthracis*, *Yersinia pestis*, and *Francisella tularensis*. *Open Microbiol J* 2010; 4: 34-46.
24. Migone TS, Bolmer S, Zhong J, et al. Added benefit of raxibacumab to antibiotic treatment of inhalational anthrax. *Antimicrob Agents Chemother* 2015; 59(2): 1145-51.
25. Preston SL, Drusano GL, Berman AL, et al. Levofloxacin population pharmacokinetics and creation of a demographic model for prediction of individual drug clearance in patients with serious community-acquired infection. *Antimicrob Agents Chemother* 1998; 42(5): 1098-104.
26. Grossman TH, Anderson MS, Drabek L, et al. The Fluorocycline TP-271 Is Efficacious in Models of Aerosolized *Bacillus anthracis* Infection in BALB/c Mice and *Cynomolgus* Macaques. *Antimicrob Agents Chemother* 2017; 61(10).
27. Kalns J, Morris J, Eggers J, Kiel J. Delayed treatment with doxycycline has limited effect on anthrax infection in BLK57/B6 mice. *Biochemical and biophysical research communications* 2002; 297(3): 506-9.
28. Hopkins AM, Wojciechowski J, Abuhelwa AY, Mudge S, Upton RN, Foster DJ. Population Pharmacokinetic Model of Doxycycline Plasma Concentrations Using Pooled Study Data. *Antimicrob Agents Chemother* 2017; 61(3).
29. Agwuh KN, MacGowan A. Pharmacokinetics and pharmacodynamics of the tetracyclines including glycylicylines. *J Antimicrob Chemother* 2006; 58(2): 256-65.
30. Saivin S, Houin G. Clinical pharmacokinetics of doxycycline and minocycline. *Clin Pharmacokinet* 1988; 15(6): 355-66.
31. Dunbar LM, Milata J, McClure T, Wasilewski MM, Team SS. Comparison of the efficacy and safety of oritavancin front-loaded dosing regimens to daily dosing: an analysis of the SIMPLIFI trial. *Antimicrob Agents Chemother* 2011; 55(7): 3476-84.
32. Darpo B, Lee SK, Moon TE, Sills N, Mason JW. Oritavancin, a new lipoglycopeptide antibiotic: results from a thorough QT study. *J Clin Pharmacol* 2010; 50(8): 895-903.
33. Mason JW, Bellibas SE, Huang NY, Sanabria CR, Darpo B. Electrocardiographic Effects of a Supratherapeutic Dose of Oritavancin. *Clin Pharmacol Drug Dev* 2016; 5(6): 502-8.
34. Rubino CM, Van Wart SA, Bhavnani SM, Ambrose PG, McCollam JS, Forrest A. Oritavancin population pharmacokinetics in healthy subjects and patients with complicated skin and skin structure infections or bacteremia. *Antimicrob Agents Chemother* 2009; 53(10): 4422-8.
35. Rubino CM, Bhavnani SM, Moeck G, Bellibas SE, Ambrose PG. Population pharmacokinetic analysis for a single 1,200-milligram dose of oritavancin using data from two pivotal phase 3 clinical trials. *Antimicrob Agents Chemother* 2015; 59(6): 3365-72.
36. Scoble PJ, Owens RC, Jr., Puttagunta S, Yen M, Dunne MW. Pharmacokinetics, Safety, and Tolerability of a Single 500-mg or 1000-mg Intravenous Dose of Dalbavancin in Healthy Japanese Subjects. *Clinical drug investigation* 2015; 35(12): 785-93.
37. Buckwalter M, Dowell JA. Population pharmacokinetic analysis of dalbavancin, a novel lipoglycopeptide. *J Clin Pharmacol* 2005; 45(11): 1279-87.
38. Carrothers TJ, Chittenden JT, Critchley I. Dalbavancin Population Pharmacokinetic Modeling and Target Attainment Analysis. *Clin Pharmacol Drug Dev* 2020; 9(1): 21-31.
